# Supplementary material
Source: MDPI journal article supplement (https://www.mdpi.com/2073-4344/12/4/423)
Supplement: s1 [file s1 › catalysts-1641727-supplementary.pdf]

# Supporting Information for:

## **Sustainable Synthesis of a Highly Stable and Coke-Free Ni@CeO<sub>2</sub> Catalyst for Efficient Carbon Dioxide Reforming of Methane**

Seung Bo Kim<sup>a,1</sup>, Ahmed Al-Shahat Eissa<sup>a,b,1,\*</sup>, Min-Jae Kim<sup>a</sup>, Emad S. Goda<sup>c</sup>, Jae-Rang  
Youn<sup>a</sup>, and Kyubock Lee<sup>a,\*</sup>

<sup>a</sup> Graduate School of Energy Science and Technology, Chungnam National University, 99  
Daehak-ro, Yuseong-gu, Daejeon 34134, Republic of Korea.

<sup>b</sup> Department of Chemistry, School of Science, South Valley University, Qena 83523, Egypt.

<sup>c</sup> Organic Nanomaterials Lab, Department of Chemistry, Hannam University, Daejeon 34054,  
Republic of Korea.

<sup>1</sup> These authors contributed equally to this work.

\* Corresponding authors: aaeissa87@o.cnu.ac.kr and kyubock.lee@cnu.ac.kr

---

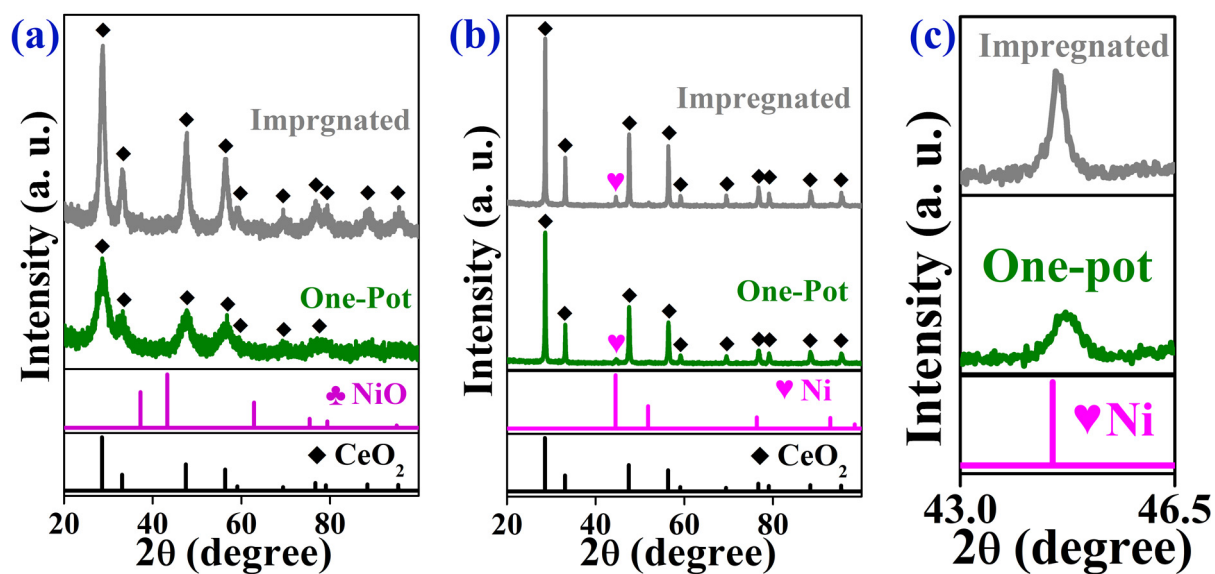

**Figure S1.** PXRD patterns of calcined (a) and reduced (b), Ni@CeO<sub>2</sub>/12.5 (One-pot) and Ni/CeO<sub>2</sub>/12.5/Impreg (Impregnated) catalysts. (c) PXRD patterns of the reduced Ni@CeO<sub>2</sub>/12.5 (One-pot) and Ni/CeO<sub>2</sub>/12.5/Impreg (Impregnated) catalysts at a slow scanning speed of 0.6 °/min (2θ= 43.0 – 46.5°).

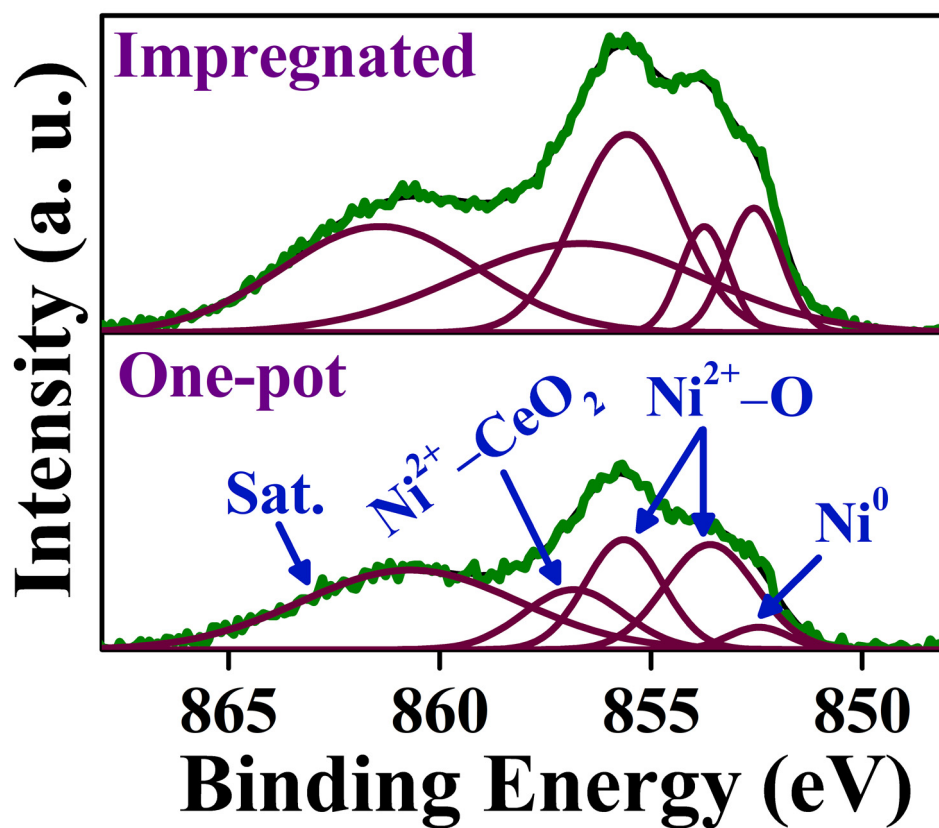

Figure S2. XPS spectra of Ni 2p in the reduced Ni@CeO<sub>2</sub>/12.5 (One-pot) and Ni/CeO<sub>2</sub>/12.5/Impreg (Impregnated) catalysts.

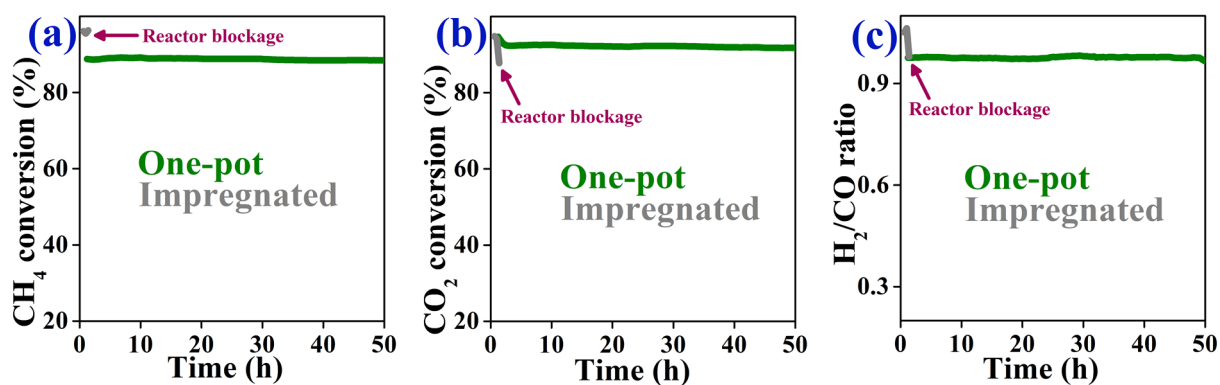

Figure S3. CH<sub>4</sub> conversions (a), CO<sub>2</sub> conversions (b), and H<sub>2</sub>/CO ratios of Ni@CeO<sub>2</sub>/12.5 (One-pot) and Ni/CeO<sub>2</sub>/12.5/Impreg (Impregnated) catalysts at a reaction temperature of 800 °C and WHSV of 24,000 mL g<sub>cat</sub><sup>-1</sup> h<sup>-1</sup> for 50.0 h.

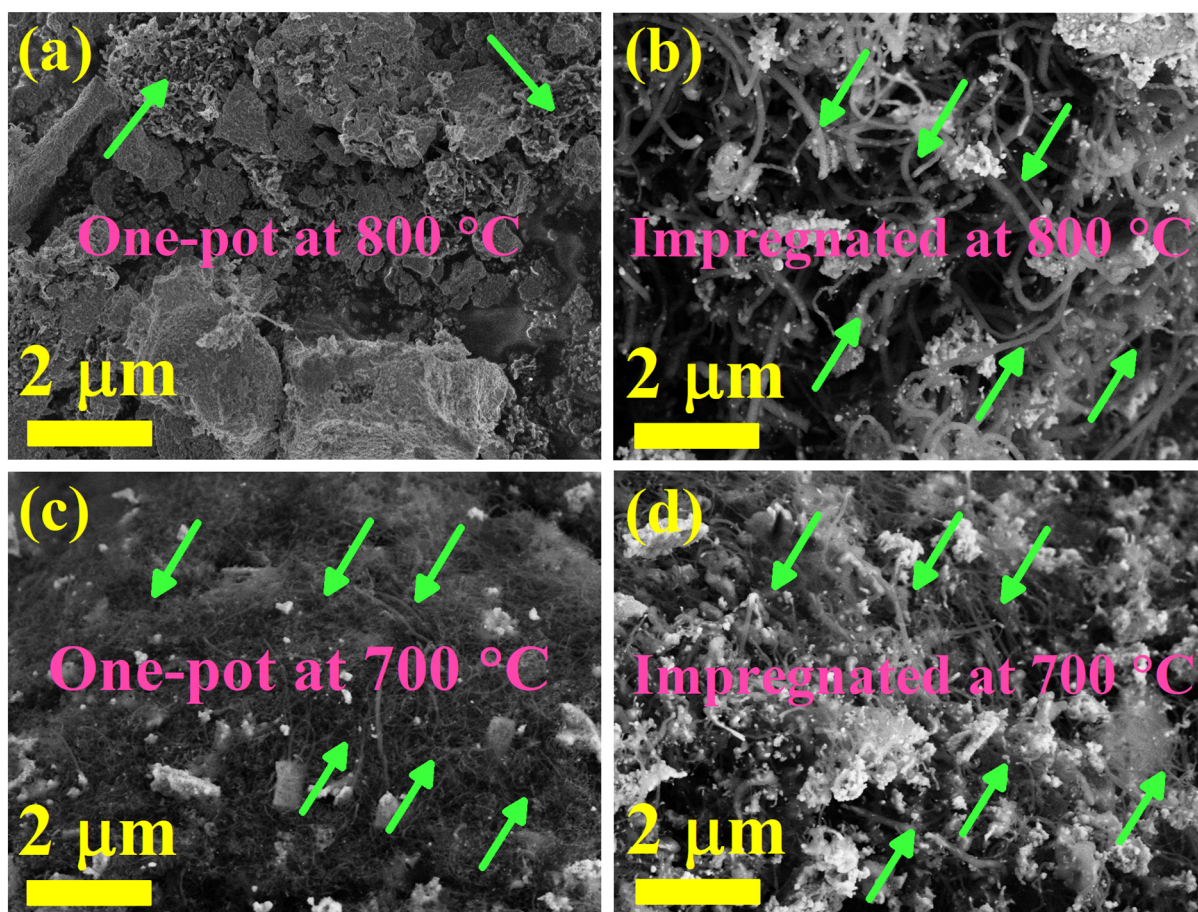

**Figure S4.** FESEM images of Ni@CeO<sub>2</sub>/12.5 (One-pot) and Ni/CeO<sub>2</sub>/12.5/Impreg (Impregnated) catalysts after operating the DRM reaction for 50.0 h, at temperature of 800 °C (a and b) and 700 °C (c and d). The green arrows refer to the carbon filaments deposited on the catalysts' surface after the reaction.

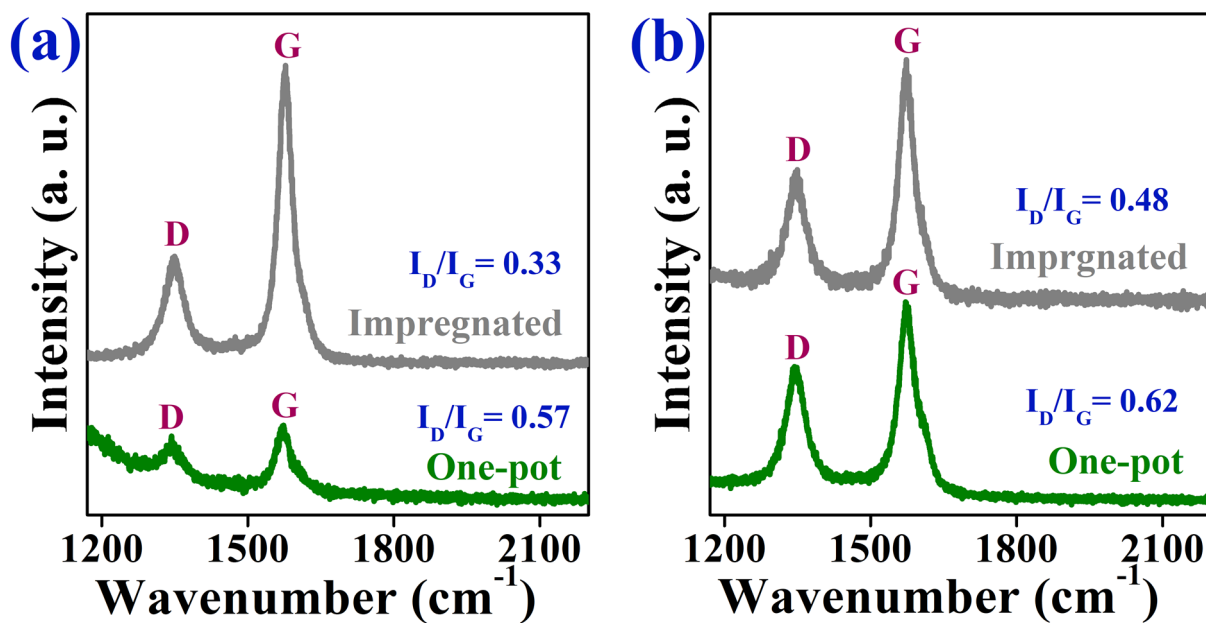

Figure S5. Raman spectra of Ni@CeO<sub>2</sub>/12.5 (One-pot) and Ni/CeO<sub>2</sub>/12.5/Impreg (Impregnated) catalysts after operating the DRM reaction for 50.0 h, at temperature of 800 °C (a) and 700 °C (b).

**Table S1. BET surface area, total pore volume, and average pore diameter of the calcined and reduced samples.**

| Material                       | Calcined samples                     |                                        |                            | Reduced samples                      |                                        |                            |
|--------------------------------|--------------------------------------|----------------------------------------|----------------------------|--------------------------------------|----------------------------------------|----------------------------|
|                                | BET surface area (m <sup>2</sup> /g) | Total pore volume (cm <sup>3</sup> /g) | Average pore diameter (nm) | BET surface area (m <sup>2</sup> /g) | Total pore volume (cm <sup>3</sup> /g) | Average pore diameter (nm) |
| <b>CeO<sub>2</sub></b>         | 57.9                                 | 0.072                                  | 5.0                        | 2.74                                 | 0.026                                  | 38.6                       |
| <b>Ni@CeO<sub>2</sub>/2.5</b>  | 78.8                                 | 0.093                                  | 4.7                        | 3.02                                 | 0.029                                  | 38.9                       |
| <b>Ni@CeO<sub>2</sub>/7.5</b>  | 79.7                                 | 0.085                                  | 4.3                        | 2.47                                 | 0.025                                  | 40.4                       |
| <b>Ni@CeO<sub>2</sub>/12.5</b> | 66.9                                 | 0.073                                  | 4.4                        | 2.10                                 | 0.020                                  | 38.6                       |
| <b>Ni@CeO<sub>2</sub>/20</b>   | 58.5                                 | 0.057                                  | 3.9                        | 1.50                                 | 0.017                                  | 44.1                       |

**Table S2. Crystal sizes of CeO<sub>2</sub> after calcination and reduction evaluated by Scherrer's equation based on XRD patterns.**

| <b>Material</b>                        | <b>Calcined<br/>samples</b> | <b>Reduced<br/>samples</b> |
|----------------------------------------|-----------------------------|----------------------------|
| <b>Ni@CeO<sub>2</sub>/2.5</b>          | 5.8                         | 48.1                       |
| <b>Ni@CeO<sub>2</sub>/7.5</b>          | 4.8                         | 42.8                       |
| <b>Ni@CeO<sub>2</sub>/12.5</b>         | 4.3                         | 39.8                       |
| <b>Ni@CeO<sub>2</sub>/20</b>           | 3.9                         | 38.1                       |
| <b>Ni@CeO<sub>2</sub>/12.5/Impreg.</b> | 10.4                        | 47.9                       |

**Table S3. Comparison of the DRM catalytic activity of our catalyst with recent Ni/CeO<sub>2</sub>-based catalysts reported in literature.**

| <b>Catalyst</b>                                         | <b>Reaction temperature (°C)</b> | <b>CH<sub>4</sub> conversion (%)</b> | <b>CO<sub>2</sub> conversion (%)</b> | <b>H<sub>2</sub>/CO ratio</b> | <b>Carbon deposition (mg/g<sub>cat</sub> h)</b> | <b>Reference</b> |
|---------------------------------------------------------|----------------------------------|--------------------------------------|--------------------------------------|-------------------------------|-------------------------------------------------|------------------|
| <b>Ni@CeO<sub>2</sub>/7.5</b>                           | <b>800</b>                       | <b>86.5</b>                          | <b>91.8</b>                          | <b>0.98</b>                   | <b>0</b>                                        | <b>This work</b> |
| <b>Ni@CeO<sub>2</sub>/7.5</b>                           | <b>700</b>                       | <b>58.3</b>                          | <b>64.2</b>                          | <b>0.91</b>                   | <b>0</b>                                        | <b>This work</b> |
| <b>Ni/CeO<sub>2</sub> Nanoflakes</b>                    | 800                              | 42                                   | 76                                   | 0.67                          | 2.75                                            | 1                |
| <b>Ni@CeZrO<sub>2</sub></b>                             | 800                              | 53                                   | 66                                   | 0.74                          | 1.6                                             | 2                |
| <b>Nd/Ni/CeZrO<sub>2</sub></b>                          | 650                              | 24                                   | 52                                   | 0.74                          | 21.3                                            | 3                |
| <b>Ru/CeO<sub>2</sub></b>                               | 700                              | 39                                   | 48                                   | -                             | -                                               | 4                |
| <b>NiIn/CeO<sub>2</sub>-Al<sub>2</sub>O<sub>3</sub></b> | 650                              | 19                                   | 33                                   | 0.50                          | 2.5                                             | 5                |
| <b>Ni-CeX-Y/SiO<sub>2</sub></b>                         | 750                              | 78                                   | 80                                   | 0.95                          | 0.25                                            | 6                |
| <b>Pt/CePr/Al<sub>2</sub>O<sub>3</sub></b>              | 800                              | 57                                   | 68                                   | 0.79                          | 0.09                                            | 7                |
| <b>PSC CeO<sub>2</sub>-NiO</b>                          | 750                              | 92                                   | 85                                   | 0.89                          | 0.37                                            | 8                |
| <b>Ni/CeO<sub>2</sub>-Al<sub>2</sub>O<sub>3</sub></b>   | 800                              | 69                                   | 82                                   | 0.69                          | 0                                               | 9                |
| <b>Ni/CeO<sub>2</sub>/YSZ</b>                           | 750                              | 62                                   | 73                                   | -                             | 1.5                                             | 10               |
| <b>Ni/CeO<sub>2</sub></b>                               | 800                              | 72                                   | 80                                   | 0.91                          | 0                                               | 11               |
| <b>Pt-Ni/CeO<sub>2</sub></b>                            | 650                              | 54                                   | 57                                   | 0.75                          | 0                                               | 12               |
| <b>Ni-CeO<sub>2</sub></b>                               | 500                              | 30                                   | 42                                   | 0.71                          | 15.4                                            | 13               |

**Table S4. Comparison of the DRM catalytic activity of our catalyst with recent Ni/CeO<sub>2</sub>-based catalysts reported in literature.**

|                                                                        | T<br>(°C) | WHSV <sup>a</sup><br>(L g <sub>cat</sub> <sup>-1</sup><br>h <sup>-1</sup> ) | CH <sub>4</sub><br>/CO <sub>2</sub><br>(v/v %) | TGA<br>weight<br>loss<br>(%) | TOS <sup>b</sup><br>(h) | <sup>c</sup><br>(mg <sub>coke</sub> ) | <sup>d</sup><br>(mg <sub>coke</sub><br>g <sub>cat</sub> <sup>-1</sup><br>h <sup>-1</sup> ) | <sup>e</sup><br>(mg <sub>coke</sub> g <sub>cat</sub> <sup>-1</sup><br>g <sub>carbon fed</sub><br>h <sup>-1</sup> ) | Ref                  |
|------------------------------------------------------------------------|-----------|-----------------------------------------------------------------------------|------------------------------------------------|------------------------------|-------------------------|---------------------------------------|--------------------------------------------------------------------------------------------|--------------------------------------------------------------------------------------------------------------------|----------------------|
| Ni@CeO <sub>2</sub> /2.5                                               | 700       | 24                                                                          | 33.3/<br>33.3                                  | 0                            | 50                      | 0                                     | 0                                                                                          | 0                                                                                                                  | <b>This<br/>work</b> |
| Ni@CeO <sub>2</sub> /7.5                                               |           |                                                                             |                                                | 0                            | 50                      | 0                                     | 0                                                                                          | 0                                                                                                                  |                      |
| Ni@CeO <sub>2</sub> /12.5                                              |           |                                                                             |                                                | 28.13                        | 50                      | 29.36                                 | 7.83                                                                                       | 0.2435                                                                                                             |                      |
| Ni@CeO <sub>2</sub> /20                                                |           |                                                                             |                                                | 26.94                        | 2                       | 27.66                                 | 184.37                                                                                     | 143.37                                                                                                             |                      |
| Ni@CeO <sub>2</sub> /2.5                                               | 800       | 24                                                                          | 33.3/<br>33.3                                  | 0                            | 50                      | 0                                     | 0                                                                                          | 0                                                                                                                  |                      |
| Ni@CeO <sub>2</sub> /7.5                                               |           |                                                                             |                                                | 0                            | 50                      | 0                                     | 0                                                                                          | 0                                                                                                                  |                      |
| Ni@CeO <sub>2</sub> /12.5                                              |           |                                                                             |                                                | 3.50                         | 50                      | 2.72                                  | 0.73                                                                                       | 0.0226                                                                                                             |                      |
| Ni@CeO <sub>2</sub> /20                                                |           |                                                                             |                                                | 28.10                        | 11                      | 29.31                                 | 35.53                                                                                      | 5.0233                                                                                                             |                      |
| Ti-CAT-II                                                              | 700       | 39                                                                          | 46.2/<br>46.2                                  | 25                           | 7                       | 33.33                                 | 47.62                                                                                      | 0.5038                                                                                                             | 14                   |
| Ti-CAT-III                                                             |           |                                                                             |                                                | 15                           | 7                       | 17.65                                 | 25.21                                                                                      | 0.2667                                                                                                             |                      |
| Flakes                                                                 | 800       | 60                                                                          | 12.5/<br>12.5                                  | 5.5                          | 20                      | 5.82                                  | 2.91                                                                                       | 0.0091                                                                                                             | 1                    |
| Ni/Ce <sub>0.8</sub> Ti <sub>0.2</sub> O <sub>2-δ</sub> ,<br>d = 22 nm | 750       | 30                                                                          | 40/<br>40                                      | -                            | 100                     | 2                                     | 0.2                                                                                        | 0.0016                                                                                                             | 15                   |
| Ni/CeO <sub>2</sub>                                                    | 800       | 150                                                                         | 40/<br>40                                      | 19.4                         | 50                      | 12.03                                 | 4.81                                                                                       | 0.0006                                                                                                             | 16                   |
| Ni/La-DC                                                               |           |                                                                             |                                                | 2.0                          | 50                      | 1.02                                  | 0.41                                                                                       | 0.0001                                                                                                             |                      |

<sup>a</sup> Weight hourly space velocity, including diluents (N<sub>2</sub>, He, etc.)

<sup>b</sup> Time on stream

<sup>c</sup> Coke deposited in an entire reaction

<sup>d</sup> Coke formation rate

<sup>e</sup> Coke formation rate, divided by carbon fed
